# Supplementary material
Source: PubMed Central journal article supplement (PMC6311111)
Supplement: NIHMS1002720-supplement-S1.pdf [file NIHMS1002720-supplement-S1.pdf]

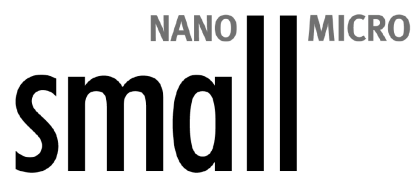

## Supporting Information

for *Small.*, DOI: 10.1002/sml.201600737

**On-Chip Production of Size-Controllable Liquid Metal  
Microdroplets Using Acoustic Waves**

*Shi-Yang Tang, Bugra Ayan, Nitesh Nama, Yusheng Bian,  
James P. Lata, Xiasheng Guo, and Tony Jun Huang\**

## **Supporting Information**

# **On-chip Production of Size-Controllable Liquid Metal Microdroplets Using Acoustic Waves**

Shi-Yang Tang<sup>a</sup>, Bugra Ayan<sup>a</sup>, Nitesh Nama<sup>a</sup>, Yusheng Bian<sup>a</sup>, James P. Lata<sup>a</sup>,

Xiasheng Guo<sup>a,b</sup>, and Tony Jun Huang<sup>a,\*</sup>

<sup>a</sup>Department of Engineering Science and Mechanics, The Pennsylvania State University,  
University Park, Pennsylvania 16802, United States

<sup>b</sup>Key Laboratory of Modern Acoustics (MOE), Department of Physics, Nanjing University,  
Nanjing 210093, China

Corresponding Author; Email: junhuang@psu.edu

## Supporting Information S1

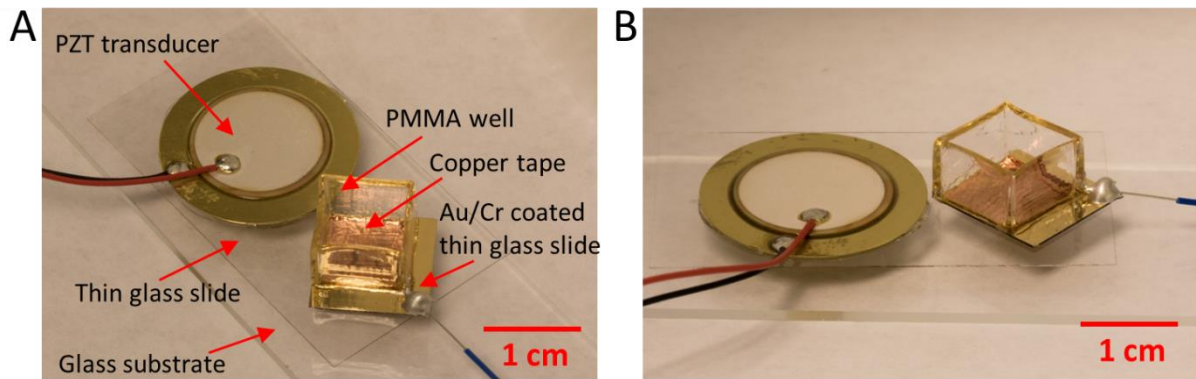

**Figure S1: Experimental setup of the acoustic-based liquid metal microdroplets production platform.**

## Supporting Information S2

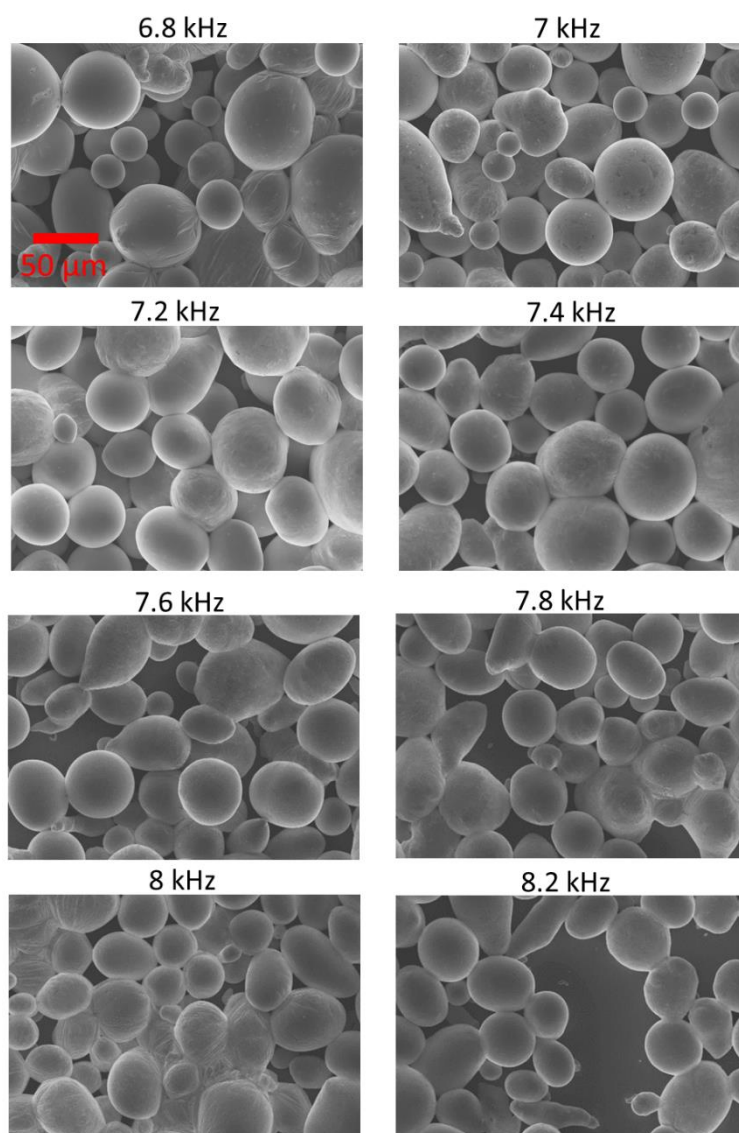

**Figure S2: Production of EGaIn microdroplets with different transducer activating frequencies.** The figure shows the SEM images for microdroplets produced when the transducer is activated by a  $175 V_{p-p}$  sinusoidal signals with the frequencies ranging from 6.8 to 8.2 kHz. The oxidative voltage applied is 0 V.

### Supporting Information S3

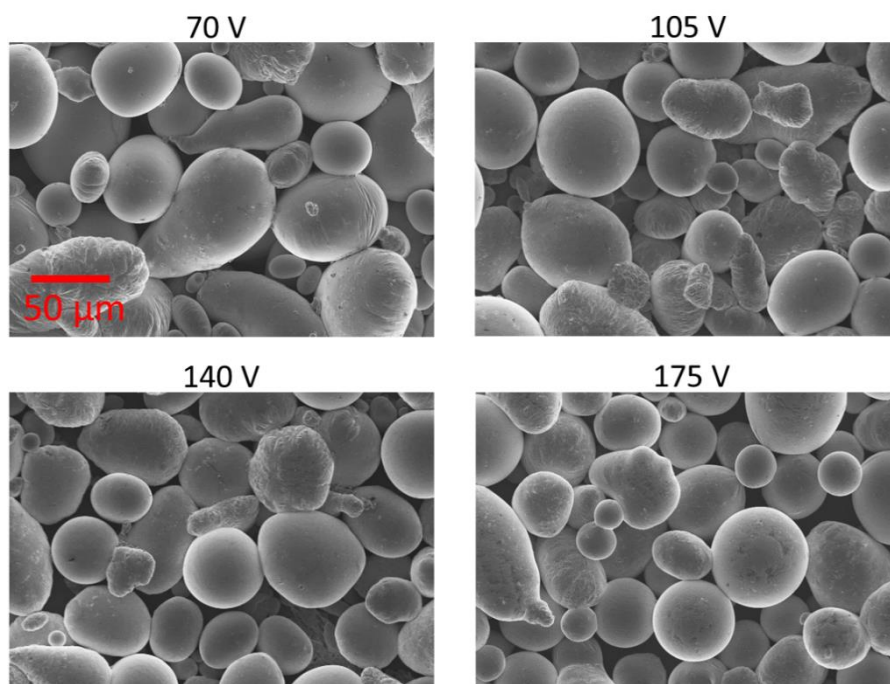

**Figure S3: Production of EGaIn microdroplets with different transducer activating voltages.** This figure shows the SEM images for microdroplets produced when the transducer is activated by a 7 kHz sinusoidal signals with  $V_{p-p}$  ranging from 70 to 175 V. The oxidative voltage applied is 0 V.

## Supporting Information S4

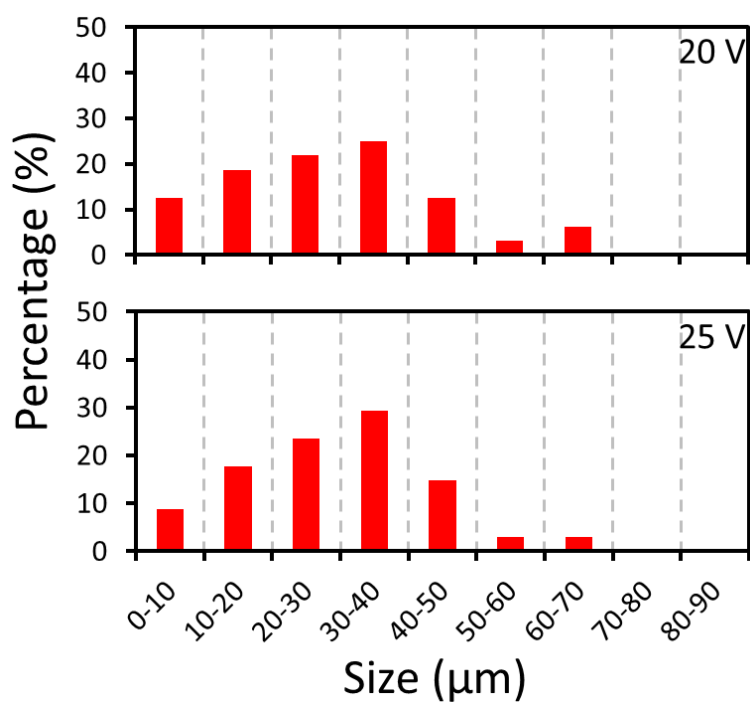

**Figure S4:** Size distribution of the EGaIn microdroplets produced when oxidative voltages of 20 and 25 V are applied to the EGaIn droplet.

## Supporting Information S5

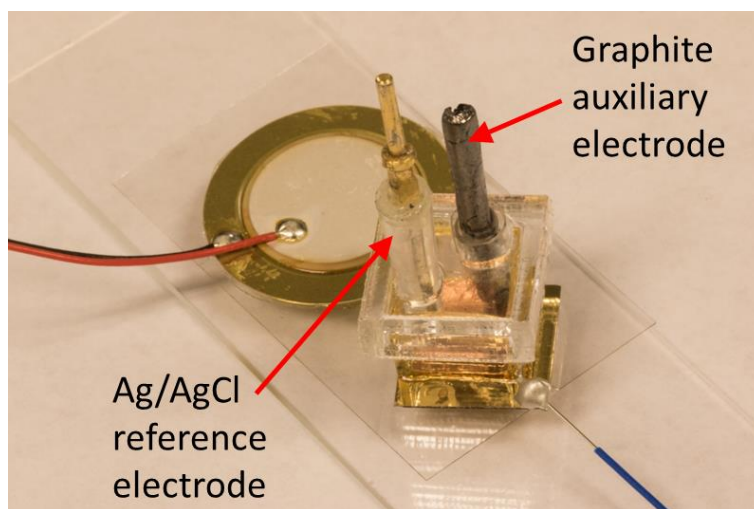

**Figure S6: Experimental setup for the electrochemical sensing of  $\text{Pb}^{2+}$  ions experiment.**

## Supporting Information S6

To understand the acoustic field inside the PMMA well, we performed numerical simulations of our system using the perturbation expansion approach. The fluid response is governed by the standard Navier-Stokes equations for a linear viscous compressible fluid:

$$\frac{\partial \rho}{\partial t} + \nabla \cdot (\rho v) = 0 \quad (\text{S1})$$

$$\rho \frac{\partial v}{\partial t} + \rho(v \cdot \nabla)v = -\nabla p + \mu \nabla^2 v + (\mu_b + \frac{1}{3}\mu)\nabla(\nabla \cdot v) \quad (\text{S2})$$

where  $\rho$  is the mass density,  $v$  is the fluid velocity,  $p$  is the fluid pressure, and  $\mu$  and  $\mu_b$  are the shear and the bulk dynamic viscosities, respectively. We note that the term associated with the bulk viscosity has been retained in the formulation to fully account for viscous attenuation both inside the boundary layer as well as in the bulk fluid.

Using the perturbation approach, we divide each flow variable into corresponding first- and second-order components, such that the first-order terms represent the time-harmonic response of the system while the second-order terms represent the steady response of the system.

$$\begin{aligned} v &= v_0 + \varepsilon \tilde{v}_1 + \varepsilon^2 \tilde{v}_2 + O(\varepsilon^3) + \dots \\ p &= p_0 + \varepsilon \tilde{p}_1 + \varepsilon^2 \tilde{p}_2 + O(\varepsilon^3) + \dots \\ \rho &= \rho_0 + \varepsilon \tilde{\rho}_1 + \varepsilon^2 \tilde{\rho}_2 + O(\varepsilon^3) + \dots \end{aligned} \quad (\text{S3})$$

where  $\varepsilon$  is a non-dimensional smallness parameter.



This amounts to a linearization of the otherwise nonlinear Navier-Stokes equations (Eq. (S1) and (S2)). This linearization results into two sets of equations, which can be successively solved to obtain the first-order and the second-order fields. The first-order fields can be thought of as the acoustic response of the system, while the second-order terms represent the steady acoustic streaming response. More details of this approach can be found elsewhere.<sup>[1]</sup>

We performed a 3D simulation of the first-order system to observe the acoustic fields inside the channel using COMSOL Multiphysics. However, the full resolution of the acoustic streaming response (the second-order equations) demands a mesh resolution of the order of viscous boundary layer width. For our device, owing to the large mismatch between the device dimensions (with substrate length of the order of 1 cm) and the characteristic length scales of the second-order solution (the viscous boundary layer width~ 1-10  $\mu\text{m}$ ), even a fully resolved 2D simulation of the full system is computationally very expensive. Noting this, while we performed 3D simulations for the acoustic response of the system (the first-order system), we were limited to a 2D simulation (of a down-scaled system) for the second-order simulation. Nonetheless, a 2D simulation of the second-order fields provide valuable qualitative insights into the acoustic streaming flow formed inside the PMMA well, which was also observed experimentally as shown in Fig. S6A-C. Fig. S6D-E shows the results of acoustic streaming flow obtained from the numerical simulation. Considering the limitations mentioned above, these results demonstrate good qualitative agreement with the experiments. We note again that these simulations are instructive in nature with regards to the acoustic streaming flow and were performed only to gain qualitative insights into the formation of acoustic streaming flow inside the PMMA well.

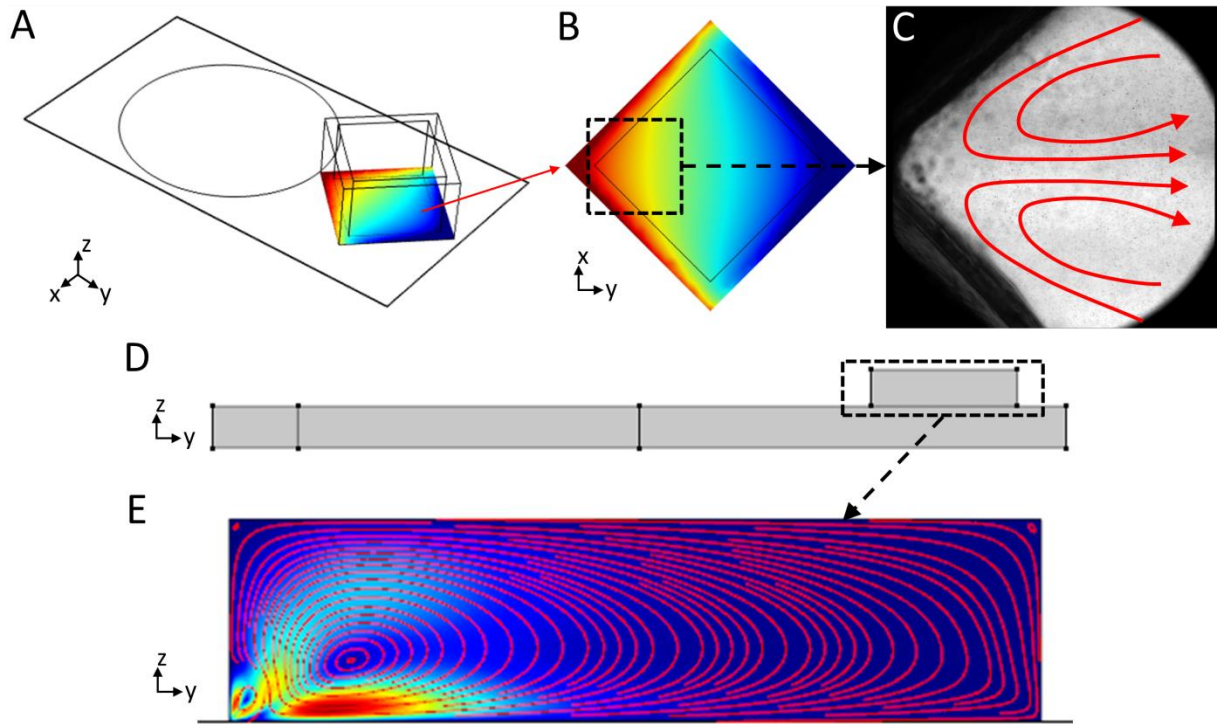

**Figure S6: Vortices induced by the transducer.** (A-B) Color plot for the distribution of pressure field in the platform (blue minimum to red maximum) obtained from numerical simulations. (C) Experimental result shows the induced vortices by acoustic waves within the PMMA well. (D) The computational domain used for the 2D simulation. (E) Zoomed in image of the PMMA well showing the color plot of the magnitude of the second-order acoustic streaming velocity (blue minimum to red maximum) while the red lines indicate the streamlines of the flow.

## Supporting Information S7

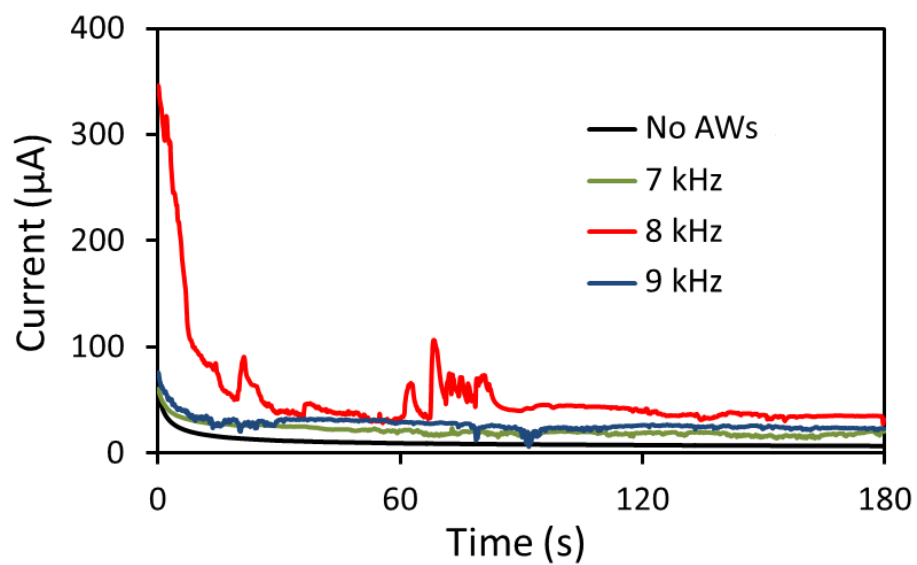

**Figure S7:** Currents recorded at the preconcentration step with different transducer activating frequencies. The concentration of  $\text{Pb}^{2+}$  ions is 10 ppm.

## Supporting Information S8

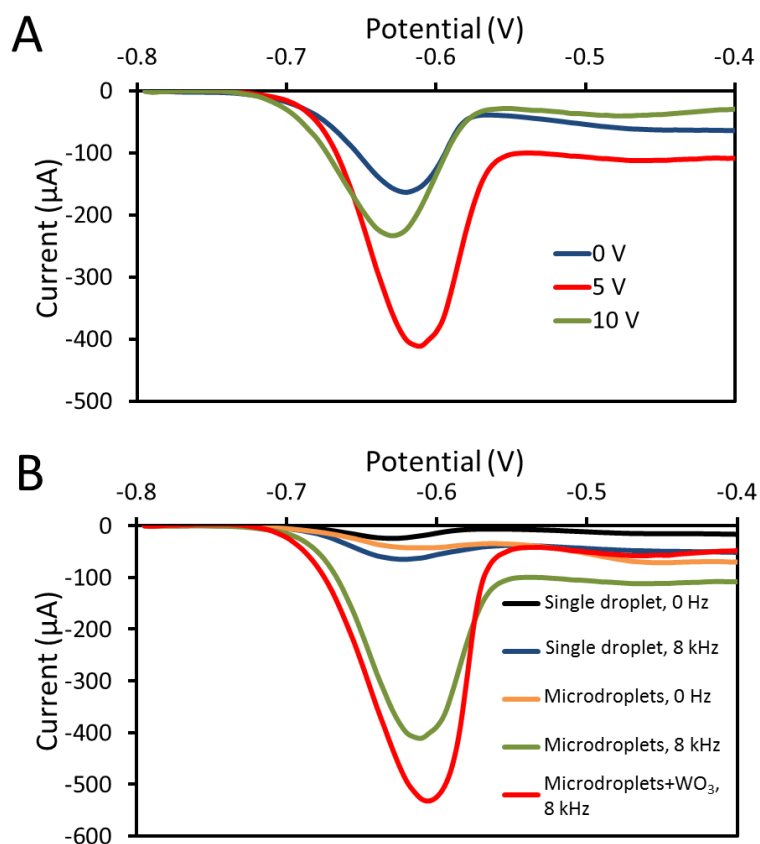

**Figure S8:** (A) DPVs of  $Pb^{2+}$  ions obtained with EGaIn microdroplets produced with different oxidative voltages. (B) Overall comparison of DPVs obtained with a single EGaIn droplet, EGaIn microdroplets and mLMMs with or without the presence of acoustic waves.

### Supporting Information Reference

[1] Nama N.; Barnkob R.; Mao Z.; Kähler C. J.; Costanzo F.; and Huang T. J., Numerical study of acoustophoretic motion of particles in a PDMS microchannel driven by surface acoustic waves, *Lab Chip*, **2015**,*15*, 2700-2709.
